# Supplementary material
Source: ML conference proceedings conference paper supplement (https://proceedings.mlr.press/v189/qiu23a.html)
Supplement: Supplementary file [file qiu23a-supp.pdf]

## Appendix

### A.1 Network Architecture

**Feature extraction network:** Since we introduced the random hidden state  $\mathbf{h}_t$  for the recurrent neural network, we use neural networks  $\varphi_\tau^{\mathbf{x}}$  and  $\varphi_\tau^{\mathbf{z}}$  for feature extraction from  $\mathbf{x}_t$  and  $\mathbf{z}_t$ , respectively.

- $\varphi_\tau^{\mathbf{x}}(\mathbf{x}_t) = \mathbf{W}_1\mathbf{x}_t + b_1$
- $\varphi_\tau^{\mathbf{z}}(\mathbf{z}_t) = \mathbf{W}_3\text{relu}(\mathbf{W}_2\mathbf{z} + b_2) + b_3$

After feature extraction from  $\mathbf{x}_t$  and  $\mathbf{z}_t$ , then, we stack  $\mathbf{x}_t$  and  $\mathbf{z}_t$  with  $\mathbf{h}_{t-1}$  together for the inference and generative model respectively.

#### Artificial data model structure:

- Encoder:
  - $\mu(\mathbf{x}_t + \mathbf{h}_{t-1}) = \mathbf{W}_1(\mathbf{x}_t + \mathbf{h}_{t-1}) + b_1.$
  - $\sigma(\mathbf{x}_t + \mathbf{h}_{t-1}) = \exp(\mathbf{W}_2(\mathbf{x}_t + \mathbf{h}_{t-1}) + b_2).$
- Decoder:
  - $\mu(\mathbf{z}_t + \mathbf{h}_{t-1}) = \mathbf{W}_{3t}(\mathbf{z}_t + \mathbf{h}_{t-1}) + b_3.$
  - $\sigma(\mathbf{z}_t + \mathbf{h}_{t-1}) = \exp(b_4).$

#### Motion capture data model structure:

- Encoder:
  - $\mu(\mathbf{x}_t + \mathbf{h}_{t-1}) = \mathbf{W}_2\text{relu}(\mathbf{W}_1(\mathbf{x}_t + \mathbf{h}_{t-1})) + b_1.$
  - $\sigma(\mathbf{x}_t + \mathbf{h}_{t-1}) = \exp(\mathbf{W}_3\text{relu}(\mathbf{W}_1(\mathbf{x}_t + \mathbf{h}_{t-1})) + b_2).$
- Decoder:
  - $\mu(\mathbf{z}_t + \mathbf{h}_{t-1}) = \mathbf{W}_{3t}\text{tanh}(\mathbf{z}_t + \mathbf{h}_{t-1}) + b_3.$
  - $\sigma(\mathbf{z}_t + \mathbf{h}_{t-1}) = \exp(b_4).$

#### Metabolomic data model structure:

- Encoder:
  - $\mu(\mathbf{x}_t + \mathbf{h}_{t-1}) = \mathbf{W}_2\text{relu}(\mathbf{W}_1(\mathbf{x}_t + \mathbf{h}_{t-1})) + b_1.$
  - $\sigma(\mathbf{x}_t + \mathbf{h}_{t-1}) = \exp(\mathbf{W}_3\text{relu}(\mathbf{W}_1(\mathbf{x}_t + \mathbf{h}_{t-1})) + b_2).$
- Decoder:
  - $\mu(\mathbf{z}_t + \mathbf{h}_{t-1}) = \mathbf{W}_{3t}\text{tanh}(\mathbf{z}_t + \mathbf{h}_{t-1}) + b_3.$
  - $\sigma(\mathbf{z}_t + \mathbf{h}_{t-1}) = \exp(b_4).$

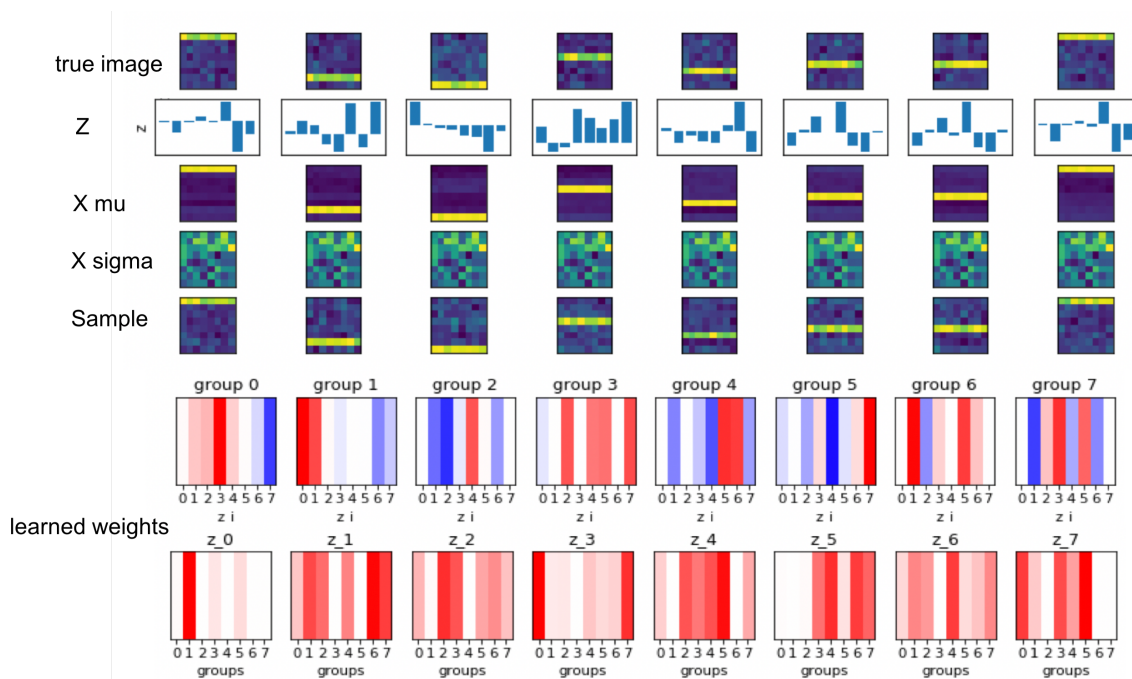

Figure 8: **Additional results of ITM-VAE on artificial data.**  $k = 8$ ,  $\lambda = 5$ , iteration = 10000, batch-size = 64,  $t = 8$ . Here, we didn't assign the  $t$  label to each image since we want to check the model sparsity induced by  $\lambda$ . **true image**: the training image, **Z**: the sampled  $z$  values from encoder, **X mu**: the decoder mean, **X sigma**: the decoder sigma, **sample**: the reconstructed image from decoder mean and sigma, **learned weights**: the learned weights from the model.

### A.2 Experimental Details

We ran Adam for the inference and generative net parameters optimization with learning rate  $1e-3$ . Proximal gradient descent was run on  $\mathbf{W}_t$  with learning rate  $1e-4$ . **Artificial data**: We chose  $\lambda = 5$ . For the first part of experiment, we want to select  $\lambda$  so we randomly selected 64 images at each iteration and replicate each image 20 times as one batch, we ran for 10,000 iterations. The data structure is  $20 \times 64 \times 64$ . For the second part of experiment, we assign the row position of bar as the time label, so in total we have  $t = 8$  different types of images, the data structure for each batch is  $8 \times 64 \times 64$ . **Motion capture data**: We chose  $\lambda = 5$ , and we used  $T = 32$  frames and replicate each frame 32 times to stack as one batch ( $32 \times 32 \times 59$ ) to train our model, optimization was run for 100 epochs. **Metabolomic data**: We chose  $\lambda = 10$ , we randomly selected  $n = 2$  as one batch, the data structure for each batch is  $12 \times 2 \times 980$ , we ran 10,000 epochs.

### A.3 Supplementary Figures

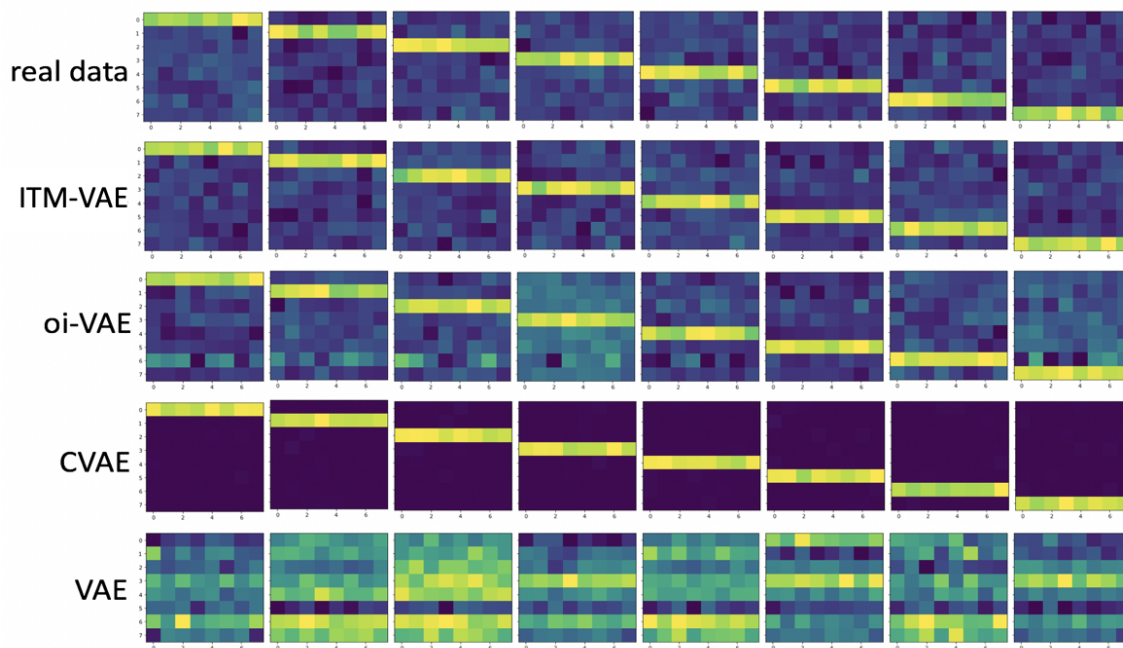

Figure 9: **Additional results of ITM-VAE on artificial data.** Reconstructed images.

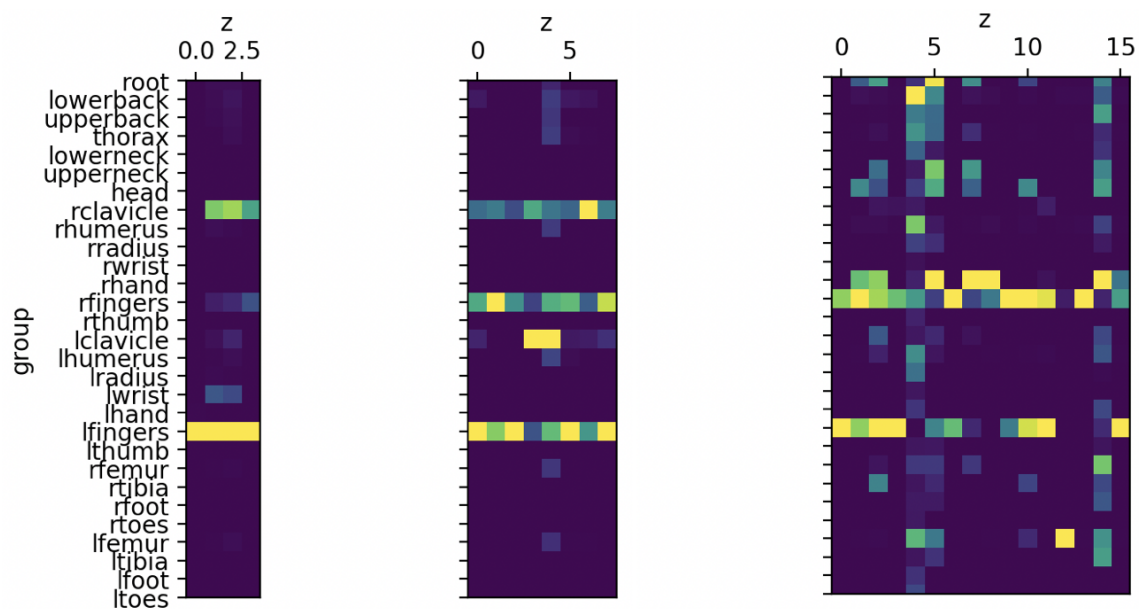

Figure 10: **Additional results from motion capture data.** The learned  $\mathbf{W}_{t::j}^{(g)}$  at time point  $t = 10$  for  $k = 4$  (left),  $k = 8$  (middle), and  $k = 16$  (right) with  $\lambda = 5$ .
